# Supplementary material for: Bacterial, Phytoplankton, and Viral Distributions and Their Biogeochemical Contexts in Meromictic Lake Cadagno Offer Insights into the Proterozoic Ocean Microbial Loop
Source: PubMed Central journal article supplement (PMC9426590; doi:10.1128/mbio.00052-22), 2022-06-21
Supplement: mbio.00052-22-s0004.pdf [file mbio.00052-22-s0004.pdf]

# Pearson Correlation Plot for Lake Cadagno Microbial loop dataset

A: Abundance  
 FCS: Flow-cytometry  
 P:CTD based Physicochemical parameters  
 D: Diversity  
 N: Nutrients

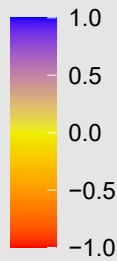

|                        | A_Chloroplast_ge    | A_Chromatium_ge     | A_FCS_Phycobilins   | A_FCS_Total_cells   | A_FCS_VLPs          | A_Lentimicrobiaceae_ge | D_16S_alpha_Shannon | D_16S_beta_Axis.1   | D_16S_beta_Axis.2   | D_FCS_alpha_cells   | D_FCS_beta_Axis1_cells | D_FCS_beta_Axis2_cells | Depth_m             | N_DOC               | N_NH4               | N_POC               | N_PON               | N_POS               | N_SO4               | Mean Day 1, 2       | P_Chl               | P_Cond              | P_Oxygen            | P_PAR_29_Aug        | P_Phycocyanin_29_Aug | P_Temp              | P_Turb              | Secondary_production |
|------------------------|---------------------|---------------------|---------------------|---------------------|---------------------|------------------------|---------------------|---------------------|---------------------|---------------------|------------------------|------------------------|---------------------|---------------------|---------------------|---------------------|---------------------|---------------------|---------------------|---------------------|---------------------|---------------------|---------------------|---------------------|----------------------|---------------------|---------------------|----------------------|
| A_Chloroplast_ge       | 1.00<br>(0.00e+00)  | 0.13<br>(7.30e-01)  | 0.16<br>(6.50e-01)  | 0.08<br>(8.33e-01)  | 0.51<br>(1.34e-01)  | 0.49<br>(1.55e-01)     | 0.60<br>(6.65e-02)  | 0.64<br>(4.75e-02)  | 0.13<br>(7.17e-01)  | 0.51<br>(1.36e-01)  | -0.57<br>(8.49e-02)    | 0.03<br>(9.36e-01)     | 0.63<br>(4.95e-02)  | 0.09<br>(8.02e-01)  | 0.45<br>(1.97e-01)  | 0.07<br>(8.54e-01)  | 0.10<br>(7.77e-01)  | 0.26<br>(4.70e-01)  | 0.28<br>(4.36e-01)  | 0.50<br>(1.37e-01)  | 0.69<br>(2.77e-02)  | -0.69<br>(2.74e-02) | -0.61<br>(6.02e-02) | 0.23<br>(5.15e-01)  | -0.69<br>(2.77e-02)  | 0.15<br>(6.75e-01)  | 0.46<br>(1.80e-01)  |                      |
| A_Chromatium_ge        | 0.13<br>(7.30e-01)  | 1.00<br>(0.00e+00)  | 0.95<br>(2.01e-05)  | 0.99<br>(8.66e-09)  | 0.32<br>(3.67e-01)  | 0.87<br>(1.16e-03)     | 0.27<br>(4.46e-01)  | 0.80<br>(5.81e-03)  | -0.10<br>(7.92e-01) | 0.68<br>(3.02e-02)  | -0.79<br>(6.26e-03)    | 0.26<br>(4.67e-01)     | 0.69<br>(2.83e-02)  | -0.05<br>(8.97e-01) | 0.30<br>(3.95e-01)  | 0.92<br>(1.31e-04)  | 0.93<br>(1.05e-04)  | 0.76<br>(1.06e-02)  | 0.60<br>(6.46e-02)  | 0.76<br>(1.04e-02)  | 0.63<br>(5.27e-02)  | -0.69<br>(2.83e-02) | -0.63<br>(5.27e-02) | 0.96<br>(1.09e-05)  | -0.71<br>(2.24e-02)  | 0.93<br>(7.25e-05)  | 0.66<br>(3.84e-02)  |                      |
| A_FCS_Phycobilins      | 0.16<br>(6.50e-01)  | 0.95<br>(2.01e-05)  | 1.00<br>(0.00e+00)  | 0.95<br>(2.89e-05)  | 0.34<br>(3.41e-01)  | 0.93<br>(1.21e-04)     | 0.43<br>(2.14e-01)  | 0.85<br>(1.80e-03)  | -0.12<br>(7.46e-01) | 0.72<br>(1.83e-02)  | -0.85<br>(1.87e-03)    | 0.30<br>(4.03e-01)     | 0.77<br>(9.57e-03)  | 0.03<br>(9.26e-01)  | 0.47<br>(1.68e-01)  | 0.78<br>(8.15e-03)  | 0.79<br>(7.13e-03)  | 0.90<br>(4.65e-04)  | 0.62<br>(5.46e-02)  | 0.75<br>(1.20e-02)  | 0.66<br>(3.93e-02)  | -0.73<br>(1.71e-02) | -0.68<br>(3.19e-02) | 0.95<br>(1.79e-05)  | -0.75<br>(1.33e-02)  | 0.96<br>(1.00e-05)  | 0.69<br>(2.62e-02)  |                      |
| A_FCS_Total_cells      | 0.08<br>(8.33e-01)  | 0.99<br>(8.66e-09)  | 0.95<br>(2.89e-05)  | 1.00<br>(0.00e+00)  | 0.33<br>(3.56e-01)  | 0.85<br>(1.82e-03)     | 0.21<br>(5.63e-01)  | 0.77<br>(8.96e-03)  | -0.04<br>(9.02e-01) | 0.63<br>(5.02e-02)  | -0.75<br>(1.22e-02)    | 0.30<br>(3.99e-01)     | 0.65<br>(4.12e-02)  | -0.09<br>(7.99e-01) | 0.24<br>(4.96e-01)  | 0.92<br>(1.45e-04)  | 0.93<br>(1.24e-04)  | 0.76<br>(1.08e-02)  | 0.62<br>(5.59e-02)  | 0.76<br>(1.09e-02)  | 0.59<br>(7.20e-02)  | -0.66<br>(3.95e-02) | -0.60<br>(6.39e-02) | 0.96<br>(8.33e-06)  | -0.68<br>(3.15e-02)  | 0.95<br>(3.30e-05)  | 0.65<br>(4.23e-02)  |                      |
| A_FCS_VLPs             | 0.51<br>(1.34e-01)  | 0.32<br>(3.67e-01)  | 0.34<br>(3.41e-01)  | 0.33<br>(3.56e-01)  | 1.00<br>(0.00e+00)  | 0.45<br>(1.94e-01)     | 0.07<br>(8.37e-01)  | 0.55<br>(9.94e-02)  | 0.76<br>(1.15e-02)  | 0.61<br>(6.21e-02)  | -0.58<br>(8.19e-02)    | -0.08<br>(8.29e-01)    | 0.73<br>(1.63e-02)  | 0.28<br>(4.26e-01)  | 0.24<br>(5.05e-01)  | 0.29<br>(4.17e-01)  | 0.31<br>(3.85e-01)  | 0.37<br>(2.99e-01)  | 0.31<br>(3.78e-01)  | 0.69<br>(2.65e-02)  | 0.81<br>(4.52e-03)  | -0.78<br>(7.97e-03) | -0.87<br>(9.98e-04) | 0.46<br>(1.86e-01)  | -0.76<br>(1.04e-02)  | 0.38<br>(2.83e-01)  | 0.63<br>(4.87e-02)  |                      |
| A_Lentimicrobiaceae_ge | 0.49<br>(1.55e-01)  | 0.87<br>(1.16e-03)  | 0.93<br>(1.21e-04)  | 0.85<br>(1.82e-03)  | 0.45<br>(1.94e-01)  | 1.00<br>(0.00e+00)     | 0.63<br>(5.17e-02)  | 0.98<br>(8.02e-07)  | -0.10<br>(7.88e-01) | 0.79<br>(6.32e-03)  | -0.94<br>(5.04e-05)    | 0.33<br>(3.47e-01)     | 0.88<br>(7.88e-04)  | 0.02<br>(9.58e-01)  | 0.57<br>(8.58e-02)  | 0.68<br>(2.96e-02)  | 0.70<br>(2.30e-02)  | 0.87<br>(1.06e-03)  | 0.62<br>(5.46e-02)  | 0.85<br>(1.88e-03)  | 0.80<br>(5.47e-03)  | -0.87<br>(1.10e-03) | -0.78<br>(7.33e-03) | 0.91<br>(2.37e-04)  | -0.88<br>(6.69e-04)  | 0.91<br>(2.28e-04)  | 0.80<br>(5.09e-03)  |                      |
| D_16S_alpha_Shannon    | 0.60<br>(6.65e-02)  | 0.27<br>(4.46e-01)  | 0.43<br>(2.14e-01)  | 0.21<br>(5.63e-01)  | 0.07<br>(8.37e-01)  | 0.63<br>(5.17e-02)     | 1.00<br>(0.00e+00)  | 0.65<br>(4.33e-02)  | -0.51<br>(1.31e-01) | 0.62<br>(5.74e-02)  | -0.66<br>(3.87e-02)    | -0.04<br>(9.19e-01)    | 0.59<br>(7.17e-02)  | 0.20<br>(5.77e-01)  | 0.74<br>(1.36e-02)  | 0.00<br>(9.92e-01)  | 0.03<br>(9.27e-01)  | 0.51<br>(1.33e-01)  | 0.25<br>(4.89e-01)  | 0.40<br>(2.46e-01)  | 0.54<br>(1.06e-01)  | -0.56<br>(8.94e-02) | -0.42<br>(2.28e-01) | 0.35<br>(3.17e-01)  | -0.57<br>(8.51e-02)  | 0.39<br>(2.62e-01)  | 0.49<br>(1.47e-01)  |                      |
| D_16S_beta_Axis.1      | 0.64<br>(4.75e-02)  | 0.80<br>(5.81e-03)  | 0.85<br>(1.80e-03)  | 0.77<br>(8.96e-03)  | 0.55<br>(9.94e-02)  | 0.98<br>(8.02e-07)     | 0.65<br>(4.33e-02)  | 1.00<br>(0.00e+00)  | 0.00<br>(1.00e+00)  | 0.81<br>(4.41e-03)  | -0.95<br>(1.98e-05)    | 0.30<br>(3.96e-01)     | 0.93<br>(8.91e-05)  | 0.04<br>(9.03e-01)  | 0.61<br>(6.00e-02)  | 0.63<br>(5.33e-02)  | 0.65<br>(4.15e-02)  | 0.83<br>(2.79e-02)  | 0.58<br>(7.94e-02)  | 0.85<br>(1.64e-03)  | 0.87<br>(1.16e-03)  | -0.93<br>(1.16e-04) | -0.85<br>(2.01e-03) | 0.85<br>(1.76e-03)  | -0.94<br>(5.38e-05)  | 0.83<br>(3.06e-03)  | 0.80<br>(5.64e-03)  |                      |
| D_16S_beta_Axis.2      | 0.13<br>(7.17e-01)  | -0.10<br>(7.92e-01) | -0.12<br>(7.46e-01) | -0.04<br>(9.02e-01) | 0.76<br>(1.15e-02)  | -0.10<br>(7.88e-01)    | -0.51<br>(1.31e-01) | 0.00<br>(1.00e+00)  | 1.00<br>(0.00e+00)  | -0.03<br>(9.29e-01) | 0.03<br>(9.26e-01)     | 0.06<br>(8.76e-01)     | 0.20<br>(5.73e-01)  | 0.01<br>(9.76e-01)  | -0.17<br>(6.46e-01) | -0.01<br>(9.81e-01) | -0.01<br>(9.83e-01) | -0.02<br>(9.54e-01) | -0.04<br>(9.06e-01) | 0.18<br>(6.15e-01)  | 0.25<br>(4.85e-01)  | -0.22<br>(5.41e-01) | -0.39<br>(2.60e-01) | -0.01<br>(9.73e-01) | -0.21<br>(5.63e-01)  | -0.08<br>(8.31e-01) | 0.09<br>(8.15e-01)  |                      |
| D_FCS_alpha_cells      | 0.51<br>(1.36e-01)  | 0.68<br>(3.02e-02)  | 0.72<br>(1.83e-02)  | 0.63<br>(5.02e-02)  | 0.61<br>(6.21e-02)  | 0.79<br>(6.32e-03)     | 0.62<br>(5.74e-02)  | 0.81<br>(4.41e-03)  | -0.03<br>(9.29e-01) | 1.00<br>(0.00e+00)  | -0.93<br>(1.04e-04)    | -0.21<br>(5.59e-01)    | 0.86<br>(1.55e-03)  | 0.54<br>(1.09e-01)  | 0.49<br>(1.48e-01)  | 0.56<br>(9.47e-02)  | 0.58<br>(7.96e-02)  | 0.61<br>(6.26e-02)  | 0.64<br>(4.81e-02)  | 0.84<br>(2.40e-03)  | 0.91<br>(2.20e-04)  | -0.90<br>(3.22e-04) | -0.87<br>(1.10e-03) | 0.77<br>(9.13e-03)  | -0.89<br>(6.13e-04)  | 0.71<br>(2.22e-02)  | 0.87<br>(1.21e-03)  |                      |
| D_FCS_beta_Axis1_cells | -0.57<br>(8.49e-02) | -0.79<br>(6.26e-03) | -0.85<br>(1.87e-03) | -0.75<br>(1.22e-02) | -0.58<br>(8.19e-02) | -0.94<br>(5.04e-05)    | -0.66<br>(3.87e-02) | -0.95<br>(1.98e-05) | 0.03<br>(9.26e-01)  | -0.93<br>(1.04e-04) | 1.00<br>(0.00e+00)     | -0.12<br>(7.32e-01)    | -0.95<br>(3.23e-05) | -0.30<br>(4.05e-01) | -0.59<br>(7.04e-02) | -0.63<br>(4.95e-02) | -0.66<br>(3.92e-02) | -0.77<br>(8.85e-03) | -0.62<br>(5.62e-02) | -0.88<br>(8.73e-04) | -0.91<br>(2.11e-04) | 0.95<br>(2.90e-05)  | 0.90<br>(4.40e-04)  | -0.85<br>(1.62e-03) | 0.95<br>(3.26e-05)   | -0.82<br>(3.97e-03) | -0.87<br>(1.06e-03) |                      |
| D_FCS_beta_Axis2_cells | 0.03<br>(9.36e-01)  | 0.26<br>(4.67e-01)  | 0.30<br>(4.03e-01)  | 0.30<br>(3.99e-01)  | -0.08<br>(8.29e-01) | 0.33<br>(3.47e-01)     | -0.04<br>(9.19e-01) | 0.30<br>(3.96e-01)  | 0.06<br>(8.76e-01)  | -0.21<br>(5.59e-01) | -0.12<br>(7.32e-01)    | 1.00<br>(0.00e+00)     | 0.16<br>(6.68e-01)  | -0.46<br>(1.76e-01) | 0.16<br>(6.68e-01)  | 0.20<br>(5.77e-01)  | 0.20<br>(5.77e-01)  | 0.43<br>(2.20e-01)  | 0.03<br>(9.34e-01)  | 0.06<br>(8.76e-01)  | 0.06<br>(7.93e-01)  | -0.10<br>(9.19e-01) | -0.04<br>(9.27e-01) | -0.03<br>(6.13e-01) | 0.18<br>(8.75e-01)   | -0.06<br>(4.77e-01) | 0.25<br>(9.26e-01)  | 0.03<br>(9.26e-01)   |
| Depth_m                | 0.63<br>(4.95e-02)  | 0.69<br>(2.83e-02)  | 0.77<br>(9.57e-03)  | 0.65<br>(4.12e-02)  | 0.73<br>(1.63e-02)  | 0.88<br>(7.88e-04)     | 0.59<br>(7.17e-02)  | 0.93<br>(8.91e-05)  | 0.20<br>(5.73e-01)  | 0.86<br>(1.55e-03)  | -0.95<br>(3.23e-05)    | 0.16<br>(6.68e-01)     | 1.00<br>(0.00e+00)  | 0.23<br>(5.15e-01)  | 0.70<br>(2.54e-02)  | 0.50<br>(1.42e-01)  | 0.52<br>(1.21e-01)  | 0.80<br>(5.83e-03)  | 0.45<br>(1.97e-01)  | 0.81<br>(4.52e-03)  | 0.94<br>(7.13e-05)  | -0.96<br>(6.91e-06) | -0.95<br>(2.90e-05) | 0.75<br>(1.17e-02)  | -0.97<br>(5.25e-06)  | 0.71<br>(2.09e-02)  | 0.77<br>(8.52e-03)  |                      |
| N_DOC                  | 0.09<br>(8.02e-01)  | -0.05<br>(8.97e-01) | 0.03<br>(9.26e-01)  | -0.09<br>(7.99e-01) | 0.28<br>(4.26e-01)  | 0.02<br>(9.58e-01)     | 0.20<br>(5.77e-01)  | 0.04<br>(9.03e-01)  | 0.01<br>(9.76e-01)  | 0.54<br>(1.09e-01)  | -0.30<br>(4.05e-01)    | -0.46<br>(1.76e-01)    | 0.23<br>(5.15e-01)  | 1.00<br>(0.00e+00)  | 0.10<br>(7.77e-01)  | -0.06<br>(8.63e-01) | -0.06<br>(8.73e-01) | -0.01<br>(9.87e-01) | 0.34<br>(3.35e-01)  | 0.18<br>(6.20e-01)  | 0.32<br>(3.73e-01)  | -0.26<br>(4.65e-01) | -0.36<br>(3.14e-01) | 0.04<br>(9.04e-01)  | -0.20<br>(5.82e-01)  | -0.02<br>(9.48e-01) | 0.37<br>(2.90e-01)  |                      |
| N_NH4                  | 0.45<br>(1.97e-01)  | 0.30<br>(3.95e-01)  | 0.47<br>(1.68e-01)  | 0.24<br>(4.96e-01)  | 0.24<br>(5.05e-01)  | 0.57<br>(8.58e-02)     | 0.74<br>(1.36e-02)  | 0.61<br>(6.00e-02)  | -0.17<br>(6.46e-01) | 0.49<br>(1.48e-01)  | -0.59<br>(7.04e-02)    | 0.16<br>(6.68e-01)     | 0.70<br>(2.54e-02)  | 0.10<br>(7.77e-01)  | 1.00<br>(0.00e+00)  | -0.02<br>(9.60e-01) | -0.00<br>(9.97e-01) | 0.72<br>(1.89e-02)  | -0.11<br>(6.68e-01) | 0.21<br>(5.69e-01)  | 0.49<br>(1.54e-01)  | -0.53<br>(1.16e-01) | -0.47<br>(1.73e-01) | 0.28<br>(4.30e-01)  | -0.54<br>(1.03e-01)  | 0.31<br>(3.85e-01)  | 0.23<br>(5.28e-01)  |                      |
| N_POC                  | 0.07<br>(8.54e-01)  | 0.92<br>(1.31e-04)  | 0.78<br>(8.15e-03)  | 0.92<br>(1.45e-04)  | 0.29<br>(4.17e-01)  | 0.68<br>(2.96e-02)     | 0.00<br>(9.92e-01)  | 0.63<br>(5.33e-02)  | -0.01<br>(9.81e-01) | 0.56<br>(9.47e-02)  | -0.63<br>(4.95e-02)    | 0.20<br>(5.77e-01)     | 0.50<br>(1.42e-01)  | -0.06<br>(8.63e-01) | -0.02<br>(9.60e-01) | 1.00<br>(0.00e+00)  | 1.00<br>(2.12e-12)  | 0.49<br>(1.54e-01)  | 0.61<br>(6.11e-02)  | 0.71<br>(2.06e-02)  | 0.52<br>(1.24e-01)  | -0.56<br>(9.19e-02) | -0.52<br>(1.25e-01) | 0.86<br>(1.36e-03)  | -0.57<br>(8.34e-02)  | 0.79<br>(6.10e-03)  | 0.58<br>(7.68e-02)  |                      |
| N_PON                  | 0.10<br>(7.77e-01)  | 0.93<br>(1.05e-04)  | 0.79<br>(7.13e-03)  | 0.93<br>(1.24e-04)  | 0.31<br>(3.85e-01)  | 0.70<br>(2.30e-02)     | 0.03<br>(9.27e-01)  | 0.65<br>(4.15e-02)  | -0.01<br>(9.83e-01) | 0.58<br>(7.96e-02)  | -0.66<br>(3.92e-02)    | 0.20<br>(5.77e-01)     | 0.52<br>(1.21e-01)  | -0.06<br>(8.73e-01) | -0.00<br>(9.97e-01) | 1.00<br>(2.12e-12)  | 1.00<br>(0.00e+00)  | 0.50<br>(1.44e-01)  | 0.62<br>(5.37e-02)  | 0.74<br>(1.50e-02)  | 0.55<br>(1.02e-01)  | -0.59<br>(7.36e-02) | -0.54<br>(1.05e-01) | 0.87<br>(9.73e-04)  | -0.60<br>(6.64e-02)  | 0.81<br>(4.95e-03)  | 0.61<br>(6.18e-02)  |                      |
| N_POS                  | 0.26<br>(4.70e-01)  | 0.76<br>(1.06e-02)  | 0.90<br>(4.65e-04)  | 0.76<br>(1.08e-02)  | 0.37<br>(2.99e-01)  | 0.87<br>(1.06e-03)     | 0.51<br>(1.33e-01)  | 0.83<br>(2.79e-03)  | -0.02<br>(9.54e-01) | 0.61<br>(6.26e-02)  | -0.77<br>(8.85e-03)    | 0.43<br>(2.20e-01)     | 0.80<br>(5.83e-03)  | -0.01<br>(9.87e-01) | 0.72<br>(1.89e-02)  | 0.49<br>(1.54e-01)  | 0.50<br>(1.44e-01)  | 1.00<br>(0.00e+00)  | 0.42<br>(2.30e-01)  | 0.57<br>(8.62e-02)  | 0.59<br>(7.25e-02)  | -0.68<br>(3.02e-02) | -0.64<br>(4.46e-02) | 0.77<br>(9.55e-03)  | -0.70<br>(2.36e-02)  | 0.80<br>(5.67e-03)  | 0.52<br>(1.20e-01)  |                      |
| N_SO4                  | 0.28<br>(4.36e-01)  | 0.60<br>(6.46e-02)  | 0.62<br>(5.46e-02)  | 0.62<br>(5.59e-02)  | 0.31<br>(3.78e-01)  | 0.62<br>(5.46e-02)     | 0.25<br>(4.89e-01)  | 0.58<br>(7.94e-02)  | -0.04<br>(9.06e-01) | 0.64<br>(4.81e-02)  | -0.62<br>(5.62e-02)    | 0.03<br>(9.34e-01)     | 0.45<br>(1.97e-01)  | 0.34<br>(3.35e-01)  | -0.11<br>(6.68e-01) | 0.61<br>(6.11e-02)  | 0.62<br>(5.37e-02)  | 0.42<br>(2.30e-01)  | 1.00<br>(0.00e+00)  | 0.75<br>(1.24e-02)  | 0.54<br>(1.04e-01)  | -0.58<br>(8.18e-02) | -0.55<br>(9.95e-02) | 0.74<br>(1.45e-02)  | -0.56<br>(9.39e-02)  | 0.69<br>(2.68e-02)  | 0.75<br>(1.21e-02)  |                      |
| P_Chl                  | 0.50<br>(1.37e-01)  | 0.76<br>(1.04e-02)  | 0.75<br>(1.20e-02)  | 0.76<br>(1.09e-02)  | 0.69<br>(2.65e-02)  | 0.85<br>(1.88e-03)     | 0.40<br>(2.46e-01)  | 0.85<br>(1.64e-03)  | 0.18<br>(6.15e-01)  | 0.84<br>(2.40e-03)  | -0.88<br>(8.73e-04)    | 0.06<br>(8.76e-01)     | 0.81<br>(4.52e-03)  | 0.18<br>(6.20e-01)  | 0.21<br>(5.69e-01)  | 0.71<br>(2.06e-02)  | 0.74<br>(1.50e-02)  | 0.57<br>(8.62e-02)  | 0.75<br>(1.24e-02)  | 1.00<br>(0.00e+00)  | 0.90<br>(3.63e-04)  | -0.91<br>(2.21e-04) | -0.88<br>(7.75e-04) | 0.89<br>(6.43e-04)  | -0.91<br>(2.54e-04)  | 0.84<br>(2.20e-03)  | 0.96<br>(1.70e-05)  |                      |
| P_Cond                 | 0.69<br>(2.77e-02)  | 0.63<br>(5.27e-02)  | 0.66<br>(3.93e-02)  | 0.59<br>(7.20e-02)  | 0.81<br>(4.52e-03)  | 0.80<br>(5.47e-03)     | 0.                  |                     |                     |                     |                        |                        |                     |                     |                     |                     |                     |                     |                     |                     |                     |                     |                     |                     |                      |                     |                     |                      |
