# Supplementary material for: Bacterial, Phytoplankton, and Viral Distributions and Their Biogeochemical Contexts in Meromictic Lake Cadagno Offer Insights into the Proterozoic Ocean Microbial Loop
Source: PubMed Central journal article supplement (PMC9426590; doi:10.1128/mbio.00052-22), 2022-06-21

# Prokaryotic Inferred Absolute Abundance (Genus)

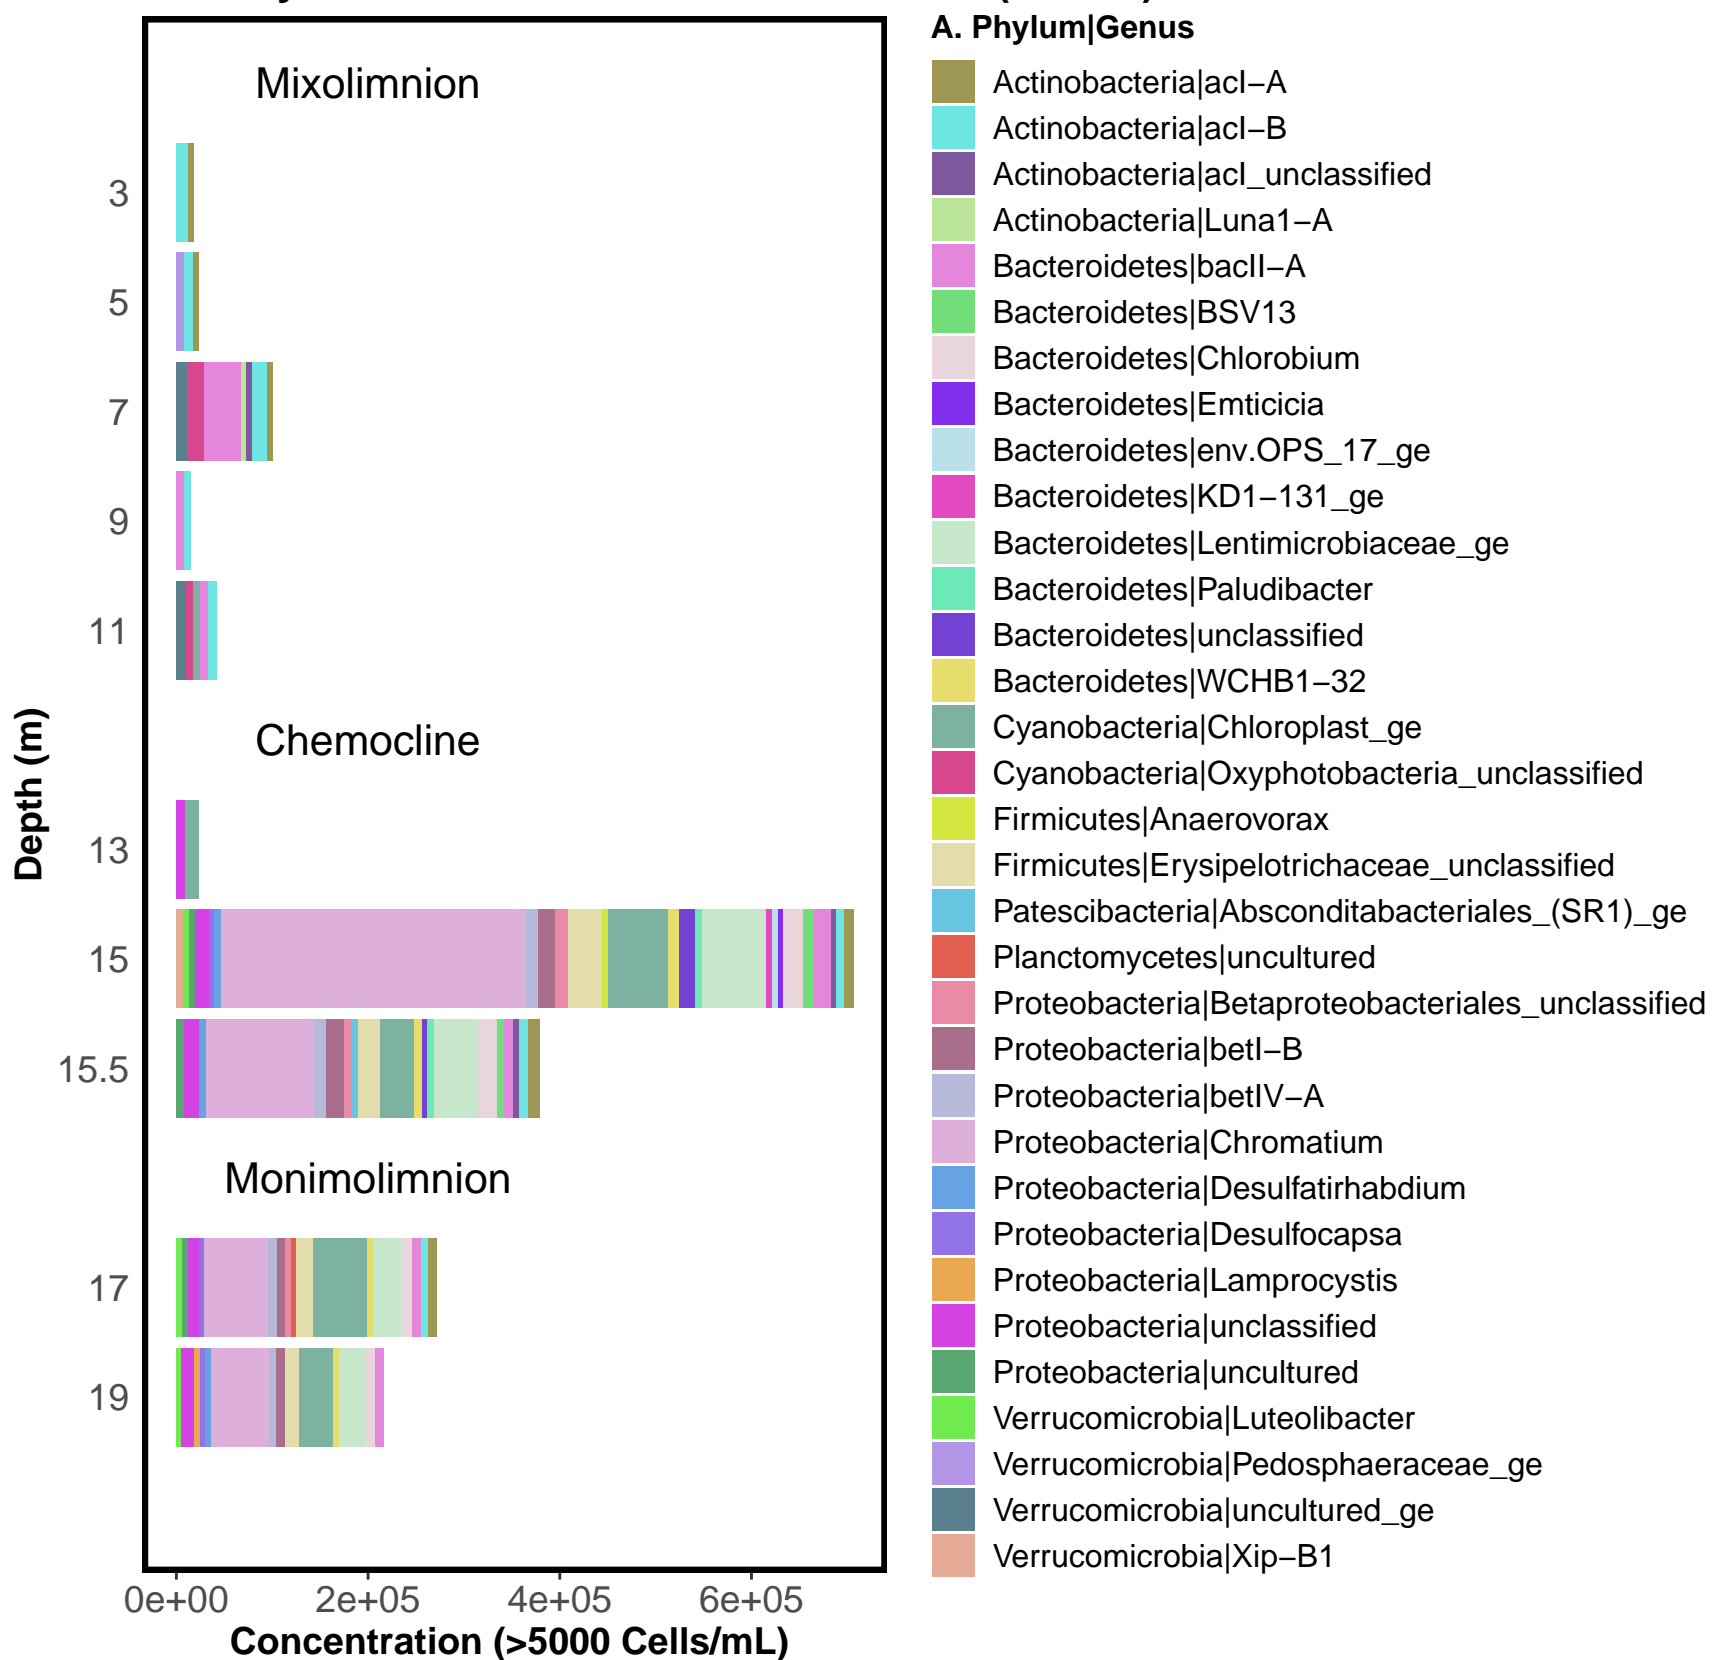

Supplement: mbio.00052-22-s0005.pdf [file mbio.00052-22-s0005.pdf]
